# Supplementary material for: Loving-Kindness Meditation vs Cognitive Processing Therapy for Posttraumatic Stress Disorder Among Veterans: A Randomized Clinical Trial
Source: PubMed Central journal article supplement (PMC8052593; doi:10.1001/jamanetworkopen.2021.6604), 2021-04-16
Supplement: jamanetwopen-e216604-s001.pdf [file jamanetwopen-e216604-s001.pdf]

1 **Study Protocol**

2

3 **Loving-Kindness Meditation and Cognitive Processing Therapy for Posttraumatic Stress Disorder**  
4 **Among Veterans: A Randomized Non-Inferiority Clinical Trial**

5

6 **Contents of this protocol summary:**

7 • **Summary of protocol changes**

8 • **IRB-approved study protocol**

9

**Table: Summary of Protocol Changes**

| <b>Date</b>   | <b>Description of Change</b>                                                                                                                                                                                                                                                                                                                                                                                                                                                                                                                                                                                                 |
|---------------|------------------------------------------------------------------------------------------------------------------------------------------------------------------------------------------------------------------------------------------------------------------------------------------------------------------------------------------------------------------------------------------------------------------------------------------------------------------------------------------------------------------------------------------------------------------------------------------------------------------------------|
| March 2014    | Prior to initiation of study, refinement of measurement battery, including: <ul style="list-style-type: none"> <li>• Change in frequency of administration of pain intensity measure, adding NIH PROMIS GI distress measure, adding curiosity subscale of Toronto Mindfulness Scale, changing FFMQ to 24-item version</li> <li>• Refinement of safety monitoring questions to include ideation of harm to self or others</li> </ul>                                                                                                                                                                                          |
| April 2014    | Prior to initiation of study, refinement of measurement battery, including: <ul style="list-style-type: none"> <li>• Refinement of safety monitoring to include assessment of suicidal intent</li> <li>• Replacement of interim cohort analyses of PTSD and depressive symptoms with individual subject monitoring for AEs</li> <li>• Updating AEs to include: worsening of PTSD/depressive symptoms, worsening alcohol use), refined questions about alcohol consumption</li> <li>• Removed exclusion criteria of prior MBSR participation and willingness to forego participation in yoga programs during study</li> </ul> |
| June 2014     | Revised data collection method for weekly measures: replaced Survey Monkey with paper assessments                                                                                                                                                                                                                                                                                                                                                                                                                                                                                                                            |
| August 2014   | Revised phone screen: <ul style="list-style-type: none"> <li>• Removed question about presence of thought disorder; removed question about whether veterans is 18 years old, removed question about whether they have PTSD</li> </ul> Removed IBS-SSS from assessments and global IBS question, replaced with PROMIS GI symptom scales                                                                                                                                                                                                                                                                                       |
| October 2014  | <ol style="list-style-type: none"> <li>1. Added recruitment letter for veterans interested in study but cannot be reached by phone</li> <li>2. Revised MINI Psychiatric Interview               <ol style="list-style-type: none"> <li>a. Removed sections J and K</li> <li>b. Replaced w/ AUCIT-C at baseline</li> <li>c. Add DAST-10 at major assessments for marijuana use</li> <li>d. Added drug cart sort at baseline</li> <li>e. Added 1<sup>st</sup> 3 questions of CAGE-AID at baseline</li> </ol> </li> </ol>                                                                                                       |
| December 2014 | Removed safety protocol requirement to contact a patient's provider in cases of non-imminent suicidal or homicidal ideation                                                                                                                                                                                                                                                                                                                                                                                                                                                                                                  |
| January 2015  | <ul style="list-style-type: none"> <li>• Modified MINI Psychiatric interview question C9 to ask whether patient had made a suicide attempt within past 10 years (instead of lifetime)</li> <li>• Added Secure Messaging option as a</li> </ul>                                                                                                                                                                                                                                                                                                                                                                               |

|               |                                                                                                                                                                                                                                                                                                                                                                                                                 |
|---------------|-----------------------------------------------------------------------------------------------------------------------------------------------------------------------------------------------------------------------------------------------------------------------------------------------------------------------------------------------------------------------------------------------------------------|
|               | <p>method of communicating reminders</p> <ul style="list-style-type: none"> <li>• Changed to administer all static assessments using Microsoft Access instead of Assessment Center</li> <li>• Added exclusion criterion: clinician recommendation of inpatient psychiatric admission within past 3 months</li> <li>• Added option of mailing paper assessments if veteran unable to attend in person</li> </ul> |
| March 2016    | <ul style="list-style-type: none"> <li>• Offered CAPS-5 over the phone if needed for those with a barrier to in person administration</li> </ul>                                                                                                                                                                                                                                                                |
| May 2016      | <ul style="list-style-type: none"> <li>• Added exclusion criteria: medical withdrawal from alcohol in past year (if currently drinking), or current drinking with high risk behavior or with past year history alcohol-related seizures or delirium tremens</li> <li>• Narrowing of criteria for an alcohol-related AE to: calculated BAC greater than 0.35.</li> </ul>                                         |
| December 2016 | <p>Permission to contact veterans by mail who completed study to inform them we are seeking additional veterans</p>                                                                                                                                                                                                                                                                                             |
| August 2017   | <ul style="list-style-type: none"> <li>• Increase maximum number of patients randomized from 170 to 204</li> </ul>                                                                                                                                                                                                                                                                                              |

## SPECIFIC AIMS

Posttraumatic stress disorder (PTSD) is a common consequence of trauma that can persist for decades and result in a major reduction in quality of life.<sup>1</sup> Symptoms of PTSD occur in 21 - 31% of soldiers previously deployed to Iraq, 10-31% of Veterans who served in Vietnam, and in similar percentages of victims of assaultive violence and civilian populations exposed to war or acts of violence.<sup>1</sup> It is estimated that the typical person with PTSD experiences symptoms for at least two decades over the lifespan and has a significant lifetime risk of suicide.<sup>2</sup> PTSD often disrupts interpersonal relationships, reduces the ability to work, decreases quality of life, and increases the risk of physical illnesses, substance abuse, and affective disorders.<sup>3</sup>

The VA National Center for PTSD recommends evidence-based pharmacologic and behavioral interventions for PTSD, including medications (selective serotonin-reuptake inhibitors and prazosin), and psychotherapeutic approaches (cognitive therapy, exposure therapy, stress management skills training, and eye movement desensitization reprocessing-EMDR).<sup>4</sup> Cognitive processing therapy (CPT), has been found to be effective in the treatment of PTSD in randomized clinical trials.<sup>5</sup> Despite the availability of these and other interventions, many persons with PTSD continue to experience persistent PTSD symptoms, as well as anger, difficulties with interpersonal relationships, shame, and grief.<sup>6</sup>

Increasing evidence suggests that as many as half of Veterans seen in VA primary care settings report using Complementary and Alternative Medicine (CAM) interventions to address a variety of difficulties<sup>7</sup> and that many do so to limit their use of medications and to ensure that their social and spiritual needs are addressed.<sup>8</sup> A CAM intervention that holds promise for addressing PTSD and depression among Veterans is Loving-Kindness Meditation (LKM). Consistent with Fredrickson's broaden-and-build model of positive emotions, LKM has been shown to broaden individuals' emotional repertoires through increased positive emotions, which mediates the building of a range of personal resources (e.g., improved social support or a sense of environmental mastery), which in turn leads to improved clinical outcomes (e.g., reduced depression).<sup>9</sup> Pilot data from an open trial conducted in our laboratory indicate that LKM is well tolerated by Veterans and is associated with increases in positive emotions, enhanced personal resources, and reductions in PTSD and depressive symptoms.

The proposed study is a randomized, controlled non-inferiority trial that will assess whether LKM results in improvement in PTSD symptoms and depression that are not meaningfully different than Cognitive Processing Therapy—Cognitive only (CPT-C), among Veterans with current PTSD. PTSD symptoms will be measured by the Clinician Administered PTSD Scale - CAPS and depression will be measured by the NIH PROMIS measure.<sup>10</sup> Additional analyses will assess whether mediators of response are consistent with the mechanisms conceptualized for each intervention. One hundred seventy Veterans with PTSD will be randomized to LKM (n = 85) or CPT-C (n = 85). Comprehensive assessments will take place post-treatment and 3- and 6- months later. The following specific aims will be accomplished through the proposed clinical trial:

**Aim 1:** Evaluate if LKM is non-inferior to CPT-C in producing reductions in PTSD symptoms among Veterans with current PTSD.

**Hypothesis 1:** Veterans randomized to LKM will report mean reductions in PTSD symptom severity that are not meaningfully worse than CPT-C, as indicated by a lower limit of the 95% confidence interval for difference in 6-month mean CAPS scores that is greater than -10 (corresponding to a standardized effect size of 0.5 between randomization arms). Results will also be assessed at the immediate post-test and 3-month time intervals. (*Addendum: The above description, based on CAPS-IV, was included in the original grant application. However, before the study began, the CAPS-5 became available and was used as the measure of PTSD symptom severity instead. For the CAPS-5, using the same criterion of  $d = 0.5$ , the non-inferiority margin was defined as 5 points on the CAPS-5. See analysis section for additional details.*)

**Aim 2:** Evaluate the non-inferiority of LKM and CPT-C in producing reductions in depressive symptoms among Veterans with current PTSD.

**Hypothesis 2:** Veterans randomized to LKM will report mean reductions in depressive symptoms that are not meaningfully worse than CPT-C, as indicated by a lower limit of the 95% confidence interval for difference in 6-month mean PROMIS depression measure that is greater than -4, corresponding to a standardized effect size of approximately 0.5 between randomization arms.<sup>11</sup> Results will also be assessed at the immediate post-test and 3-month time intervals.

**Exploratory Aim:** Evaluate potential mediators of response to LKM and to CPT to provide preliminary information regarding whether they are consistent with the mechanisms of change conceptualized by each intervention to be associated with improvement in PTSD and depression.

70 **Exploratory Hypothesis 1:** Enhanced self-compassion will more strongly mediate PTSD and  
71 depressive symptom improvement for those assigned to LKM than those assigned to CPT-C.

72 **Exploratory Hypothesis 2:** Reductions in posttraumatic maladaptive beliefs will more strongly mediate  
73 PTSD and depressive symptom improvement for those assigned to CPT-C than those assigned to  
74 LKM.

## 75 **BACKGROUND AND SIGNIFICANCE**

76 Posttraumatic stress disorder (PTSD) is a common consequence of trauma that can persist for decades  
77 and result in a major reduction in quality of life.<sup>1</sup> PTSD affects approximately 8% of the general population of  
78 the US. The clinical hallmarks of PTSD include recurrent, intrusive recollections or reexperiencing of a  
79 traumatic event, avoidance of external or internal cues that can trigger reexperiencing, emotional numbing, and  
80 hyperarousal.<sup>12</sup> PTSD has been shown to have a greater impact on quality of life than major depression and  
81 obsessive-compulsive disorder.<sup>13</sup> Symptoms of PTSD occur in 21 to 31% of soldiers previously deployed to  
82 Iraq,<sup>14</sup> 10-31%<sup>15</sup> of Veterans who served in Vietnam, and in similar percentages of victims of assaultive  
83 violence and civilian populations exposed to war or acts of violence.<sup>1</sup> It is estimated that the typical person with  
84 PTSD experiences active symptoms for at least two decades over the lifespan<sup>1</sup> and has a significant lifetime  
85 risk of suicide; PTSD has a stronger association with suicidality than any other anxiety disorder.<sup>2</sup> PTSD often  
86 disrupts interpersonal relationships, reduces the ability to work, impairs quality of life, and increases the risk of  
87 physical illnesses, substance abuse, and affective disorders.<sup>3</sup> Among individuals seeking treatment for PTSD,  
88 the rate of PTSD/depression comorbidity was found to be nearly 50% in the original national comorbidity study  
89 sample.<sup>16</sup> Individuals suffering from both PTSD and depression have higher rates of suicidal ideation than  
90 those with either disorder alone, though rates of actual suicide attempts are consistent across those with PTSD  
91 only and comorbid PTSD/depression, and both groups report significantly higher rates than those with  
92 depression only.<sup>17</sup> Comorbid PTSD and depression is also associated with greater risk of various physical  
93 conditions than is PTSD alone.<sup>3</sup> Thus, PTSD complicated by co-occurring depression is associated with even  
94 greater suffering and compromised functioning than is PTSD alone.

95 The VA National Center for PTSD recommends evidence-based pharmacologic and psychotherapeutic  
96 interventions for PTSD, including medications (selective serotonin-reuptake inhibitors and prazosin), and  
97 psychotherapeutic approaches (cognitive therapy, exposure therapy, stress management skills training, and  
98 eye movement desensitization reprocessing-EMDR).<sup>4</sup> Selective serotonin reuptake inhibitors (SSRIs) produce  
99 improvement in the major symptom clusters of PTSD, although the magnitude of the treatment effect is  
100 modest.<sup>18</sup> Prazosin, an alpha-antagonist, reduces trauma-related nightmares and has also been found to have  
101 a significant effect on all of the PTSD symptom clusters.<sup>18</sup> Despite these and other pharmacologic agents,  
102 many persons with PTSD continue to experience persistent PTSD symptoms, as well as anger, difficulties with  
103 interpersonal relationships, shame, and grief.<sup>6</sup> Psychotherapeutic techniques are often combined with  
104 pharmacotherapy in the treatment of PTSD. Prolonged exposure (PE) therapy facilitates emotional processing  
105 of the traumatic event, helping individuals to develop less phobic responses to internal and external trauma  
106 cues.<sup>19</sup> However, PE is difficult for many Veterans to complete, as evidenced by a high dropout rate (38%).<sup>20</sup>  
107 PE may also fail to address the entire realm of posttraumatic psychopathology including anger control,  
108 interpersonal difficulties or grief.<sup>6</sup> In addition, PE and EMDR are usually administered by an individual therapist  
109 rather than as a group treatment, which limits the ability to efficiently deliver these interventions to large  
110 numbers of persons. Cognitive Processing Therapy (CPT) can be delivered either individually or in group  
111 settings and has some initial support for efficacy in addressing PTSD among Veterans. In addition to concerns  
112 about dropout for some Veterans, another potential shortcoming of current treatment for PTSD is the lack of  
113 empirical data to guide treatment for persons with multiple psychiatric diagnoses. Psychiatric conditions other  
114 than PTSD commonly co-occur with PTSD,<sup>16</sup> yet persons with multiple psychiatric diagnoses have often been  
115 excluded from clinical trials. A further limitation is that many studies employed interventions delivered by expert  
116 PTSD therapists with extensive experience, raising the question of whether the favorable results from these  
117 clinical studies can be generalized.<sup>20</sup>

118 The VA has invested considerable resources to disseminate both PE and CPT through national roll-  
119 outs to increase the likelihood that Veterans will have access to these empirically supported treatments.  
120 Although research published in 2004 indicated that neither of these empirically supported treatments were  
121 widely utilized by therapists within the VA,<sup>21</sup> more recent findings suggest that the roll-outs have met with initial  
122 success and plans are in place to monitor future penetration of PE and CPT within the VA.<sup>22</sup> These efforts will  
123 no doubt relieve a great deal of suffering among Veterans with PTSD. However, given the large number of  
124 Veterans with PTSD, many with significant comorbidities and not all of whom will benefit from or elect to  
125 participate in PE or CPT, additional cost-effective treatments suitable for broad implementation are needed.

126 Evidence indicates that about 15% of the US adult population utilizes mind-body therapies, with a  
127 significantly higher rate found among persons with two or more chronic diseases.<sup>23</sup> Emerging evidence  
128 indicates that Veterans also use various complementary and alternative medicine (CAM) interventions at high  
129 rates. A large multisite study of VA outpatients found that 27% of Veterans had utilized some form of CAM in  
130 the past year.<sup>24</sup> Another study of Veterans found that nearly 50% reported using a CAM intervention, and high  
131 daily stress, chronic medical illness and a perceived negative impact of military service on mental or physical  
132 health were significant predictors of CAM use.<sup>7</sup> Qualitative research among Veterans also suggests that  
133 dissatisfaction with the reliance of conventional care on prescription medications and neglect of social and  
134 spiritual aspects of health serve as motivating factors for CAM use.<sup>8</sup> In addition to chronic symptoms of PTSD  
135 and depression, the presence of chronic illnesses associated with PTSD along with dissatisfaction with  
136 reliance on prescription medications are likely to positively impact recruitment for the current study. Our past  
137 experience offering meditation-based interventions as a clinical service to Veterans provides additional  
138 evidence that LKM is likely to be an acceptable treatment modality among Veterans.

139 Loving-Kindness Meditation (LKM) is a CAM approach that facilitates increased positive emotions  
140 through meditation exercises designed to develop feelings of warmth, kindness, and compassion for self and  
141 others. A growing body of literature indicates that self-compassion is associated with healthy psychological  
142 functioning (including life satisfaction and social connectedness), and negatively associated with self-criticism,  
143 rumination, thought suppression, anxiety and depression.<sup>25</sup> Self-criticism, rumination and thought suppression  
144 are phenomena frequently associated with PTSD, as is depression.<sup>26</sup> Therefore an intervention that increases  
145 self-compassion may impact clinical manifestations of PTSD. In a study of PTSD symptoms in university  
146 students, greater self-compassion significantly correlated with lower rates of avoidance symptoms, but not re-  
147 experiencing or hyperarousal,<sup>27</sup> suggesting that individuals with higher self-compassion may engage in fewer  
148 avoidance strategies. 'Compassionate mind training,' which is an intervention designed to teach self-  
149 compassion, was offered to six individuals in a small pilot study by Gilbert et al.<sup>28</sup> The authors found significant  
150 reductions in depression, self-criticism, anxiety and shame over time, and postulated that teaching techniques  
151 that generate feelings of self-soothing and inner warmth may be particularly helpful for persons with a history of  
152 trauma, due to pervasive feelings of shame and self-criticism coupled with the relative inability for self-soothing  
153 in this population.<sup>28</sup> Many persons with PTSD have a long history of traumatic experiences, and have rarely felt  
154 safe or reassured. Pervasive feelings of shame and guilt are common in the setting of PTSD.

155 Increasing evidence supports LKM as a technique for enhancing positive emotions and health  
156 generally. Support for the efficacy of LKM to increase positive emotions was found in a study by Fredrickson  
157 and colleagues.<sup>9</sup> This study was conducted with 139 community dwelling individuals employed by a single  
158 company. The subjects were randomized to either LKM (n=67) or waitlist control (n=72). Those in the LKM  
159 group reported significantly greater positive emotions and were significantly less depressed at the end-point  
160 assessment than the no-LKM group, even though both groups reported a similar frequency of negative  
161 emotions day-to-day. They also found that positive emotions persisted after meditation sessions ended, and  
162 that over time, repeated LKM practice produced a cumulative increase in positive emotions on subsequent  
163 days, regardless of whether the individual had practiced meditation on that day.<sup>9</sup> A pilot study of LKM for  
164 chronic low back pain by Carson et al compared a group that underwent LKM (n=18) with a group receiving  
165 standard care (n = 22) and found that those in the LKM group reported lower pain ratings, less anger, and less  
166 psychological distress (note: positive emotions do not appear to have been assessed).<sup>29</sup> Another study of LKM,  
167 performed in a group of community participants, indicated that a single brief session of LKM training led to  
168 increased self-esteem and sense of social connectedness relative to a control condition.<sup>30</sup> In a report of case  
169 studies in which LKM was taught to persons with schizophrenia, LKM appeared to be of potential benefit for  
170 persistent negative symptoms.<sup>31</sup>

171 In LKM practice, a person sits quietly and calls to mind a particular person (e.g., a good friend) and  
172 focuses on bringing a sense of positive regard to that individual through a series of standard phrases invoking  
173 the desire for safety, happiness, health, and ease or peace for them. Classically, four phrases are used, such  
174 as: "may you be safe," "may you be happy," "may you be healthy," and "may your life unfold with ease." Next,  
175 the person brings positive regard to other individuals or categories of people, including themselves, neutral  
176 persons, and those who have caused difficulty or harm (see Approach section), changing the phrases as  
177 needed (i.e., "may you be safe" becomes "may I be safe").<sup>32</sup> This systematic development of kindness toward  
178 self and others is intended to change the orientation to one's self, others, one's life experiences, and to result  
179 in a broadening of the range of emotional responses and choices available. Loving-kindness practice has its  
180 roots in the Buddhist tradition, but as described above an increasing number of studies have successfully  
181 applied it as a non-religious practice. The phrase loving-kindness derives from the Pali word metta, which can

182 be translated as “love” or “unconditional friendliness,” or “loving-kindness,” akin to the Greek word “agape,”  
183 which is typically translated as wide open unconditional love. The words loving-kindness are intended to  
184 describe an emotional state that is not a sentimental love or a feeling of passion. Rather, it can be described as  
185 an unconditional friendliness, benevolence, and openness toward experience – even difficult experience.

186 It can be postulated that the intentional cultivation of kindness and acceptance promoted in LKM  
187 practice will positively influence multiple aspects of recovery from trauma. Although the factors described  
188 below might also be developed through mindfulness practice (e.g., in MBSR through breathing meditation),  
189 LKM is a distinct form of practice that is often considered more accessible and therefore more helpful to  
190 persons who are in significant ongoing distress. Simply said, many persons find it easier, and more helpful, to  
191 adopt and stay with a practice of LKM, which relies on the repetition of simple phrases meant to foster  
192 kindness and compassion towards self and others, as compared to practicing breathing or body scan  
193 meditation. This may be particularly true when an individual is in severe emotional pain. This is in agreement  
194 with the recommendations of Buddhist teachers, who have been reported to recommend LKM practice instead  
195 of other forms of practice when people are in significant distress.<sup>32</sup> The lives of persons with PTSD are marked  
196 by ongoing severe emotional (and often accompanying physical) pain, including the hallmark emotion of fear.  
197 In the historical Buddhist record, LKM was originally taught as a way of working with and ‘staying with’ the  
198 strong emotion of fear, which, as noted, is the predominant emotional experience in PTSD. Indeed, one of the  
199 core features of PTSD is thought to be a phobic response to reminders of a traumatic event and to the  
200 memories associated with that event, which in conjunction with information processing problems, lead to  
201 pervasive fear and poor functioning.<sup>33</sup> One aspect of LKM practice that can be hypothesized to apply to a key  
202 post-trauma sequela is re-establishment of a sense of safety, or basic trust. Trauma can shatter the sense of  
203 basic trust in others, oneself, and the world at large. Disruptions in basic trust, as well the tendency to avoid  
204 reminders of the trauma in social situations, often result in withdrawal from close relationships.<sup>34</sup> The repetition  
205 of LKM phrases can be hypothesized to represent a mechanism to recreate a safe ‘holding environment,’  
206 which in LKM is created by self-directed phrases of positive intention. This may prove particularly helpful when  
207 kindness and support are lacking in the environment. Social support has been shown to be an important factor  
208 in recovery from PTSD.<sup>35</sup> The incremental restoration of a sense of basic trust, as well as an increased ability  
209 to self-modulate pervasive feelings of shame, guilt and inferiority may lead to an enhanced sense of self-  
210 efficacy. Over time, enhancement of these factors might be expected to play a role in restoration of a  
211 connection to the sense of self that has been lost through traumatic experiences, and may lead to a sense of  
212 reconnection with the community as well. The cultivation of positive emotions through LKM might be also  
213 particularly helpful for the numbing and constrictive symptoms characteristic of chronic PTSD, which can  
214 present as feelings of chronic alienation and deadness. Providing a technique through which positive emotions  
215 can repeatedly be enhanced, as in LKM practice, may provide an innovative pathway to address these  
216 numbing and constrictive symptoms.

217 While practicing LKM, a person is asked to notice and feel the positive emotion elicited by each of the  
218 phrases of positive intention, or to notice if there is a sense of reluctance, hesitation, or even aversion for the  
219 self or another. The practitioner is encouraged to have compassion for these responses and to notice them  
220 without judgment. More generally, during LKM, when a person becomes distracted by thoughts that arise  
221 during the practice, they are instructed to notice what has distracted them with an attitude of non-judgmental,  
222 mindful attention, then return to the LKM phrases and the breath without self-criticism. Walking meditation is  
223 also used as a method to teach LKM. Informal LKM practices are also encouraged - participants are asked to  
224 practice LKM toward themselves or others during everyday activities such as walking, eating, washing the  
225 dishes, or standing in line at the grocery store.

### 226 **LKM and the Broaden-and-Build Theory of Positive Emotions**

227 The broaden-and-build theory of positive emotions provides a framework for understanding the  
228 potential influence of LKM practice on affect, behaviors, and quality of life.<sup>9,36</sup> The broaden-and-build theory  
229 proposes that positive emotions momentarily broaden a person’s attention and thinking, and with this  
230 broadened outlook they are able to build personal resources. A key postulate in the broaden-and-build theory  
231 is that positive emotions broaden a person’s thought-action repertoire.<sup>36</sup> As described by Fredrickson: “Joy  
232 sparks the urge to play, interest sparks the urge to explore, contentment sparks the urge to savour and  
233 integrate, and love sparks a recurring cycle of each of these urges within safe, close relationships.”<sup>36</sup> The  
234 broadened mindset associated with positive emotions is contrasted to a narrow focus often associated with  
235 negative emotions, and characterized by specific, repetitious thought-action tendencies (e.g., fight or flight). A  
236 second key postulate of the broaden-and-build theory is that the broadened mindset associated with positive  
237 emotions leads to the building of enduring personal resources. These personal resources are thought to arise

through new thought-action sequences such as play, curiosity, and openness to new situations and ideas, as well as new social interactions. Personal resources built may include cognitive resources (e.g., the ability to mindfully attend to the present moment), psychological (e.g., a sense of purpose in life, self-acceptance or self-compassion, or a sense of environmental mastery) social (e.g., improved ability to give and receive social support) or physical (e.g., reduced susceptibility to stress-associated illnesses).<sup>9</sup> According to the broaden-and-build theory, people who have developed these personal resources are more likely to successfully navigate life's challenges and live happier, healthier lives.

There is growing evidence in support of the broaden-and-build theory. The 'broaden' hypothesis predicts that positive emotions broaden a person's attention and thinking. Support for this hypothesis comes from studies of experimentally-induced positive emotional states (through LKM in some cases as well as through other means), which show that positive emotions broaden the scope of a person's visual attention, increases one's openness to new experiences, improves ability to accept critical feedback, improves ability to recognize persons of another race,<sup>37</sup> broadens one's repertoire of desired actions, and enhances a sense of connection with others.<sup>9</sup> In a randomized controlled trial of LKM vs. a waitlist control (described in detail above), the findings supported both the 'broaden' aspect (enhanced positive emotions) as well as the 'build' part of the theory (enhanced personal resources).<sup>9</sup> When life satisfaction was assessed as an outcome, positive emotions predicted life satisfaction only to the extent that they built personal resources.<sup>9</sup> In addition, when depression was assessed as an outcome, LKM was found to have direct effects on depressive symptoms as well as additional effects mediated by built personal resources.<sup>9</sup> The built cognitive, psychological and social resources appear to have enhanced the ability of persons randomized to LKM to ward off symptoms of depression. Similarly, in the proposed trial, we hypothesize that personal resources will be built as a result of LKM practice, which will positively influence both depressive and PTSD symptoms.

## Mediators

Identification of active components of treatments is a priority for treatment research.<sup>38</sup> The proposed study will evaluate potential mediators of change thought to be specific to each intervention.

**LKM:** We will evaluate whether enhanced self-compassion mediates change in PTSD and depression for LKM. Self-compassion can be considered a healthy form of self-acceptance. Neff defines self-compassion as comprised of three facets: (1) treating oneself kindly and without harsh judgment in the setting of pain and failure, (2) perceiving that mistakes and hardships are part of the common human experience rather than isolating, and (3) maintaining mindful, non-judgmental awareness of thoughts and feelings rather than overidentifying with them.<sup>39</sup> Self-compassion is distinct from self-esteem, which is typically defined as an evaluative process in which one's abilities and characteristics are compared to standards.<sup>39</sup> Self-compassion is also distinct from self-centeredness, because self-compassion acknowledges the ubiquity of pain and hardship among humans. LKM is considered a method to enhance self-compassion. As suggested by our pilot work with LKM, we hypothesize that for those in the LKM arm of the study self-compassion will mediate improved outcomes for persons with PTSD such that changes in self-compassion will both temporally precede changes in PTSD and when they are statistically controlled, the changes in PTSD will be attenuated. There is initial support for this hypothesis from the literature.<sup>40,41</sup> In an analysis of people with a history of major depression randomized to a mindfulness intervention or maintenance antidepressants, enhanced self-compassion mediated the relationship between participation in mindfulness training and reduced depressive symptoms at follow-up.<sup>41</sup> The possibility of a key role for self-compassion is consistent with emerging theory and evidence that self-compassion is adaptive in the setting of painful or difficult thoughts and feelings.<sup>28,40</sup> It is also possible that changes self-compassion will mediate changes in PTSD for those in the CPT-C arm of the study, but we anticipate that these effects will be less robust than for those in the LKM arm of the study.

**CPT-C:** We will evaluate whether reductions in posttraumatic maladaptive cognitions mediates improvement in PTSD and in depression for CPT-C. CPT is hypothesized to facilitate improved emotional processing through repeated practice restructuring dysfunctional beliefs and appraisals of situations that are related to the individual's trauma history, which lead to painful affect and reactive behavioral choices.<sup>42,43</sup> Reduction of posttraumatic maladaptive beliefs is postulated to be a key ingredient in CPT that will mediate improvement. Indeed, recent work evaluating whether cognitive change predicts symptom reduction in the context of cognitive therapy found support for this idea. Analysis of weekly measures collected during a course of cognitive therapy found that changes in posttraumatic cognitions preceded and predicted changes in PTSD symptom severity and that changes in PTSD symptom severity did not precede or predict changes in posttraumatic cognitions.<sup>44</sup> Although this work was done in the context of an alternate cognitive therapy intervention, Cognitive Therapy for PTSD, and not CPT, the finding suggests that CPT is also likely to result in



293 such changes in beliefs and appraisals that in turn mediate PTSD symptom reduction. The proposed project  
294 would afford the opportunity to evaluate whether this is the case for Veterans who participate in group-based  
295 CPT-C. <sup>45</sup> We will also be able to assess whether reductions in maladaptive cognitions also mediates  
296 reductions in PTSD for those who receive training in LKM.

### 297 **The Approach: What LKM Is and Isn't**

298 Having provided an overview of what LKM is, we also believe it is important to delineate it from other  
299 approaches with which it may be confused. First, although both LKM and mindfulness meditation practices  
300 involve sitting meditation, typically with closed eyes and an initial focus on the breath, they differ in several  
301 respects. Mindfulness meditation cultivates the ability to pay attention, without judgment in the present  
302 moment, whereas LKM specifically develops the ability to experience kindness, warmth, and openheartedness  
303 toward self and others. The intentionality of LKM is toward developing the ability to experience positive  
304 emotions, rather than developing non-judgmental awareness. Second, LKM differs from intercessory prayer.  
305 Although in LKM practice the phrases repeated express the intention of wellbeing for self and others (see  
306 below), it is made clear that there is no expectation that the LKM phrases will actually benefit others. Instead, it  
307 is made explicit that the goal of LKM practice is to benefit oneself, such that in developing the capacity to  
308 experience kindness toward self and others, the person who holds this intention actually benefits.  
309 Unfortunately the intercessory prayer literature has not evaluated whether praying for others has a salutary  
310 effect on the people doing the praying, though research on spiritual involvement, including prayer activity, has  
311 found that Veterans with greater spiritual involvement have better physical and mental health than those with  
312 less spiritual involvement.<sup>46</sup> Third, although LKM involves the repetition of phrases, it is distinct from mantram  
313 repetition practices, which involve bringing attention to a repeated phrase or word that facilitates  
314 disengagement from difficult thoughts and feelings, and encourages relaxation. In LKM, phrases of positive  
315 intention are utilized as a means to bring forth compassion for self and others, and to foster a broadened  
316 emotional repertoire. Through the process of practicing LKM with different people in mind, LKM is thought to  
317 reshape relationships with others, as well as to foster self-compassion. Of note, an additional effect of LKM is  
318 that in the process of choosing phrases of positive intention (which carry personal meaning for a participant),  
319 clarification of values and one's intentions occurs. LKM is also distinct from practices explicitly intended to  
320 promote forgiveness, although forgiveness may occur through LKM practice. For the purposes of scientific  
321 study, we have chosen to not include explicit forgiveness practice as part of our study. In LKM, the practice is  
322 intended to develop the ability to look at others and see oneself, and in so doing, develop self-compassion and  
323 compassion for others. An expanded understanding of the commonality of human experience, such that all  
324 humans suffer and all desire happiness, which is fostered by LKM, is likely to lead to forgiveness. In addition,  
325 LKM is also distinct from the practice of verbalizing positive affirmations. While there may be some overlap with  
326 regard to the shared emphasis on positivity, affirmations tend to be stated as though they are definite personal  
327 qualities and are intended to strengthen self-confidence (e.g., "I am a good, kind person"), whereas LKM is  
328 usually stated as an invitation or request that is intended to tap into the intention for kindness and compassion  
329 for oneself and for others (e.g., "may I be safe from harm," "may you be happy and healthy"). Importantly,  
330 another way that LKM is distinct from positive affirmations is that LKM is a meditation practice intended to  
331 broaden attention and allow positive emotions to remain in awareness for sustained periods of time. Finally,  
332 LKM is not intended to be used to remove painful thoughts or feelings. Rather than attempting to rid oneself of  
333 these experiences, it is anticipated that individuals with PTSD can learn through LKM that pain can co-exist  
334 with positive feelings because, after all, it is part of being human to experience both. This may help address the  
335 phenomenon that we have frequently observed clinically wherein individuals with PTSD are afraid to  
336 experience positive emotions because it is painful when they end. By re-learning (or learning for the first time)  
337 that it is safe to feel good and that it is normal to have good feelings (and painful ones) that wax and wane, the  
338 often profound emotional numbing typically associated with PTSD may be mitigated.<sup>47</sup>

### 339 **Overview of Proposed Interventions**

#### 340 **Intervention #1: Loving-Kindness Meditation (LKM)**

341 The LKM course follows the instructions for LKM as described by Salzberg.<sup>32</sup> During the 12 meetings  
342 the ten to twelve group participants will receive instruction from two expert meditation teachers (who will co-  
343 teach the sessions) in the practice of LKM, including both in-session practice of LKM and group discussions.  
344 The intervention is designed to allow patients to adopt skills and techniques they can continue to practice  
345 without the need for an ongoing relationship with a therapist. LKM is taught in a non-religious format. A class-  
346 by-class outline is provided in the participant workbook (Appendix 3).

347 In order to help develop concentration, a necessary component of LKM practice, the first two sessions  
348 focus on cultivating mindful attention of one's breath. The primary LKM practice begins in week 3, and involves

349 sitting in a comfortable, relaxed position with closed eyes or a neutral visual focus and then bringing to mind  
350 various categories of beings – self and others. The meditator is then asked to gently repeat phrases to the  
351 person who he or she has brought to mind; these phrases are intended to have meaning in terms of what is  
352 wished for that person. In order to facilitate stepped learning, the class begins their LKM practice focusing on a  
353 positive benefactor and over the remaining nine weeks other individuals and categories of individuals are  
354 introduced, including the self and people who have caused the participant difficulty or harm.

355 **Intervention #2: Cognitive Processing Therapy (CPT).** The CPT intervention is based on Patricia Resick and  
356 colleagues' manual for treating PTSD among military veterans.<sup>48</sup> This version of CPT highlights both combat traumas  
357 and interpersonal violence and is therefore more appropriate for our population than the original version, which  
358 focuses on adult rape survivors. (See CPT manual: Appendix 4) CPT evolved directly out of Social-cognitive  
359 Information Processing Theory (SCIPT), which posits that deficits in emotional and cognitive processing of traumatic  
360 events lead to the development of PTSD.<sup>48</sup> The fundamental assumption of the theory is that post-trauma  
361 psychopathology occurs when there is a failure to integrate perceptions of the traumatic event with preexisting  
362 beliefs.<sup>49</sup> SCIPT posits recovery from a traumatic event occurs when beliefs affected by the traumatic event are  
363 integrated with prior beliefs.<sup>49</sup> Recovery happens when beliefs affected by the event are accurate and realistic and  
364 negative affect about the trauma is processed. Avoidance symptoms, according to this theory, maintain the other  
365 symptoms, in that they both prevent the memory of the traumatic event from being integrated with prior beliefs, and  
366 prevent the examination of inaccurate beliefs affected by the traumatic event.

367 CPT combines cognitive restructuring with emotional processing of trauma related content. The therapy  
368 sessions initially focus on rigid or inaccurate beliefs about the traumatic event itself, which often reflect self-  
369 blame or hindsight bias. Later sessions address over-generalized beliefs about the self and others that result  
370 from a traumatic event. CPT focuses on over-generalized trauma-related beliefs relevant to five key areas:  
371 safety, trust, power, esteem, and intimacy. Over the course of treatment, clients learn to identify and modify  
372 these beliefs in order to develop more balanced, flexible, and ultimately, more adaptive beliefs.

373 Cognitive processing therapy (CPT), has been found to be effective in the treatment of PTSD in  
374 randomized clinical trials conducted by different research teams and with different trauma exposed  
375 populations, including survivors of sexual and physical assault<sup>50</sup> and combat Veterans.<sup>51</sup> In these trials, CPT  
376 was effective in reducing symptoms of PTSD and depression for up to 5 to ten years.<sup>50</sup> CPT has also been  
377 found to be effective in reducing negative emotions such as grief, shame, guilt and anger.<sup>50,51</sup> Based on these  
378 randomized clinical trials, CPT is being widely disseminated, including to the US Veterans' Administration (VA)  
379 mental health system.

380 A version of CPT that does not include writing a trauma narrative has also been evaluated, CPT-C, and  
381 has been found to be associated with more rapid improvement than standard CPT-C as well as comparable  
382 outcomes to standard CPT.<sup>43</sup> The elimination of the trauma narrative makes CPT-C more conducive to a  
383 group-based delivery platform as it reduces the risk that group participants will be traumatized by one another's  
384 stories. CPT-C has recently been shown to be effective in a group format for Veterans, active duty military  
385 personnel, and reservists with PTSD.<sup>5</sup> In a randomized controlled trial (N=107), group CPT-C was compared to  
386 present-centered therapy (PCT) and the former found to be more effective than the latter in reducing PTSD  
387 and depressive symptoms in active duty military personnel with PTSD. Between group comparisons showed  
388 that the CPT-C group had significantly greater improvement in PTSD symptoms than PCT with a medium  
389 effect size ( $d=0.42$ ;  $p = 0.03$ ).<sup>5</sup>

390 **Importance of Study Findings to VHA:** The demand for mental health services provided by VHA has grown  
391 dramatically in recent years - more than a half millions Operations Iraqi Freedom and Enduring Freedom  
392 (OIF/OEF) Veterans have sought VHA care while the number of Vietnam Veterans receiving VHA mental  
393 health services has doubled over the past decade.<sup>52</sup> PTSD is highly prevalent among Veterans, with  
394 prevalence rates<sup>13</sup> of approximately 20 - 30% of combat Veterans.<sup>14 15</sup> A study of approximately 104,000  
395 OIF/OEF Veterans found that 25% received a mental health diagnosis when they accessed VA health care,  
396 and of these, 13% were diagnosed with PTSD.<sup>53</sup> To respond to the growing demand for mental health  
397 services, consensus recommendations have identified the need for further research on nontraditional delivery  
398 systems and group-based interventions to significantly expand the availability of cost-effective therapies.<sup>54</sup>  
399 Given the large number of persons with PTSD, not all of whom will opt for or benefit sufficiently from PE or  
400 CPT, additional cost-effective treatments suitable for broad implementation are needed that address persistent  
401 symptoms and reduced QOL. Thus, if LKM is shown to be non-inferior to CPT, it would represent a novel, and  
402 likely cost effective, approach to mental health care delivery.

403 A key tenet of patient-centered care is that health care practitioners listen to and honor patient and  
404 family perspectives and choices. Patient and family knowledge, values, beliefs, and cultural backgrounds are  
405 incorporated into the planning and delivery of care. This study would provide information to help patients  
406 decide whether a contemplative practice, such as LKM meditation, presents a viable alternative to a trauma-  
407 focused behavioral intervention such as CPT-C.  
408

## 409 **APPROACH**

### 410 **Design Overview and Rationale**

411 The proposed study is a randomized controlled non-inferiority trial comparing Loving-Kindness Meditation  
412 (LKM) with Cognitive Processing Therapy – Cognitive only (CPT-C) for treatment of PTSD and depression  
413 among Veterans recruited from the VA Puget Sound Health Care System. Veterans (N = 170) with PTSD will  
414 be randomized to receive 12 weeks of either LKM (n = 85) or CPT-C (n = 85). The two interventions are  
415 structurally similar - Each intervention meets for 90 minutes per week for twelve weeks; the overall amount of  
416 treatment time is the same across the two interventions. Both interventions will be delivered to groups of  
417 Veterans by experienced leaders, and fidelity coding from audiotapes will evaluate protocol adherence.  
418 Participants will complete brief take home paper assessments weekly for the 12-week duration of the active  
419 treatment phase to assess key outcomes, potential mediators of change, and completion of homework  
420 assignments. All participants in each study condition will complete an in-person baseline assessment, which  
421 will be repeated immediately after the treatment phase as well as 3- and 6- months post-intervention. In-  
422 person assessments will be performed by a blinded assessor.

423 **Use of an Active Control Arm:** The active control will account for the non-specific elements of LKM (e.g.,  
424 group support, positive expectancy). The proposed control arm is CPT-C, which will provide the same amount  
425 of clinician-exposure time (it is also a group-based, 12-week duration, 90-minute per session program). Similar  
426 to LKM, CPT-C is taught by experienced instructors who believe in the benefit of the program; allegiance of the  
427 researcher/therapist has been shown to be strong predictor of treatment outcomes.<sup>55</sup> CPT-C therefore  
428 contains key elements of an active control – it is structurally similar to LKM (thus controlling for non-specific  
429 elements of the intervention) and given that it is an accepted PTSD treatment, CPT-C will foster positive  
430 expectation for intervention success by both therapists and patients. Each of these elements has been  
431 described as necessary for an appropriate active control.<sup>56</sup>

### 432 **Settings, Recruitment, and Participants**

433 Settings. The study's clinical activities will take place at VAPSHCS; Seattle Division. In FY10 over 17,700  
434 Veterans with chart diagnoses of PTSD received care at VAPSHCS and over 10,000 of them had a mental  
435 health stop code, indicating that the majority were likely invested in addressing their PTSD symptoms. VA  
436 Puget Sound has the nation's largest clinical program for PTSD.

437 Recruitment. The primary mechanism of recruitment will be letters sent to Veterans with a diagnosis of  
438 PTSD (as identified using a VA database called the Corporate Data Warehouse; CDW). To illustrate the  
439 effectiveness of this method, we are currently conducting a trial of MBSR for Gulf War Syndrome (see  
440 preliminary studies) for which we are already successfully recruiting at the same rate as for the proposed RCT.  
441 Thus, the goal of recruiting 8 Veterans per month with PTSD is feasible given the large pool of Veterans with  
442 PTSD.

443 Participants. Based on our experiences recruiting individuals with PTSD for LKM and MBSR research, we  
444 anticipate that we will need to conduct phone screens with approximately 350 individuals and in-person  
445 screening. We anticipate that we will enroll at least 250 male and female Veterans over age 18 with a current  
446 DSM-IV diagnosis of PTSD enrolled at VAPSHCS who will provide informed consent and undergo in-person  
447 screening. Of these, we anticipate that 170 individuals with PTSD who meet study criteria will be randomized.  
448 Gender and ethnic/racial distribution of the participants is expected to mirror that of our prior PTSD MBSR  
449 studies in which similar recruitment strategies were used; that is 40% female, 79% Caucasian, 8% African  
450 American, 6.5% Hispanic, and 6.5% other.

451 Inclusion and Exclusion Criteria. Inclusion criteria: current DSM-5 diagnosis of PTSD, age  $\geq$  18 years, and  
452 English fluency. Participants must be willing to not participate in Mindfulness-Based Stress Reduction (MBSR)  
453 or Prolonged Exposure (PE) therapy during the study period. Exclusion criteria: current substance use  
454 dependence disorder other than alcohol; alcohol involvement that poses a safety concern (i.e., currently  
455 drinking and has a past year history of alcohol-related seizures or delirium tremens), suicide attempt or suicidal  
456 ideation with intent or plan, self-harm in the past month, a psychotic disorder, uncontrolled bipolar disorder,  
457 chart diagnoses of borderline personality disorder, antisocial personality disorder, or dementia in-patient

458 admission for psychiatric reasons within the past month, prior participation in LKM, or CPT. Medication,  
459 supportive individual or group counseling, case management, and self-help programs will be allowed  
460 concurrently and assessed as potential covariates.

## 461 **Sequence of Study Visits**

462 Telephone Screen. Veterans who contact the Project Manager will be provided an overview of the study.  
463 Veterans who remain interested will undergo a 15-20-minute telephone screen to ascertain basic  
464 inclusion/exclusion criteria.

465 In-person Screen and Baseline Assessment. Following informed consent, participants will undergo a 2-  
466 hour assessment. The Study Assessor will conduct standardized interviews for the presence of exclusionary  
467 disorders (relevant subsections of the MINI International Neuropsychiatric Interview) and for diagnosing PTSD  
468 (Clinician Administered PTSD Survey; CAPS).<sup>57</sup> Self-report measures will be administered on a VA-approved  
469 computer. Those who are eligible to continue the study will receive their randomization assignment within  
470 approximately one week and will begin either LKM or CPT-C within one month.

471 Weekly Paper Assessments. Participants will complete brief measures of PTSD and depressive  
472 symptomatology, the hypothesized mediators of change (self-compassion and maladaptive posttraumatic  
473 cognitions), and homework activity for 12 weeks during the active treatment phase.

474 Follow-up Assessments. Participants will complete a post-treatment assessment within a week of  
475 completing LKM or CPT-C, and will repeat the assessment battery 3- and 6-months thereafter.

## 476 **Randomization**

477 We will utilize a blocked randomization approach stratified by symptom severity on PTSD because our pilot  
478 studies indicate that those who score in the severe range (60 or higher)<sup>57</sup> on the PCL decrease their PTSD  
479 symptoms more than those with less severe PTSD but are still more symptomatic at immediate post-test.  
480 Baseline severity of PTSD will be dichotomized based on CAPS-5 scores  $\geq 37$  Because our pilot data did not  
481 suggest that severity of depression moderated outcome, we will not include that in the randomization  
482 stratification. Similarly, we chose not to stratify on gender because our pilot data indicate that this factor is not  
483 predictive of PTSD symptoms at follow-up. A series of randomization tables will be constructed and will be  
484 maintained by the research coordinator. Subjects will be randomized in small blocks of varying size using  
485 concealed allocation, after the baseline assessment and within two weeks before the next study cohort is set to  
486 begin treatment.

## 487 **Study Interventions:**

### 488 **#1 LKM Course Overview**

489 Each class meeting will begin with either a brief mindfulness meditation (weeks 1 and 2) or an LKM  
490 meditation followed by an opportunity for participants to discuss their experiences integrating LKM class  
491 material into their daily lives. New material will then be presented, typically introducing a new category of  
492 beings (i.e., benefactor, oneself, strangers, etc.) and particular challenges associated with working with that  
493 category of beings will be discussed. The class will then practice LKM incorporating the new category and then  
494 discuss the experience. At the end of each class the homework for the next week will be presented and class  
495 will end with another brief LKM practice. Participants will be provided with an LKM meditation CD and a  
496 workbook to accompany the class. (See appendix 3, LKM manual, for additional details). An overview of the  
497 class schedule is provided below:

498 Classes 1 and 2 provide an introduction to in mindfulness meditation.

499 Class 3 introduces LKM, including the LKM phrases and a description of the meaning of each phrase. Begin  
500 LKM practice toward a benefactor, which is defined as a person who has been kind or helpful and for whom  
501 there is gratitude, and respect. Participants will be asked to recall the ways this benefactor has helped them,  
502 and the goodness within this person.

503 Class 4 introduces the theme of commitment to our own happiness as a basis for intimacy and connection with  
504 self and others. Exercise: "Remembering the good within you" (Instructions: "For 10-15 minutes call to mind  
505 something you have said or done that was a kind or good action"). Acknowledgement and discussion of the  
506 finding that LKM toward our self is often difficult. If participant is unable to practice LKM toward self, suggestion  
507 of the concept that underlying all action is a desire to be happy – this may provide a method of noticing  
508 kindness toward oneself that already exists; this may act as a starting point for feeling positive emotion for  
509 oneself. LKM toward benefactor and self with the 4 phrases.

510 Class 5 begins with a discussion of homework - LKM in the previous week toward a benefactor and self.  
511 Introduction of walking meditation and the concept of a beloved friend (may be a person or an animal).

512 Class 6 begins with a discussion of how it is often more difficult to practice LKM toward self as compared to a  
513 benefactor or beloved friend. Examination of how our life experiences up to this point may affect our  
514 experience practicing LKM.

515 Class 7 introduces the concept of a neutral person – someone we do not strongly like or dislike. Perhaps this is  
516 a person we do not know well. This may bring up the awareness that this may be difficult because of the  
517 judgments we hold for people around us as well as pervasive fears and mistrust.

518 Class 8 begins with a discussion of homework - LKM to a neutral person. Have your feelings for that person  
519 changed? Introduction of a difficult person: a person with whom we have experienced conflict and toward  
520 whom we feel anger or lack of forgiveness. This could be someone who has been unsupportive or who  
521 responded to us in ways that were not helpful when we needed them. At this stage, participants will be  
522 instructed at this stage to not choose the person who has caused them the most pain or suffering in their lives  
523 – while acknowledging that this is a suggested goal of LKM practice. Discussion of how practicing LKM does  
524 not mean a sentimental love toward that person, as well as a discussion of anger – how it can serve the  
525 purpose of setting boundaries and can challenge injustice, but can also cause suffering for the person who  
526 holds anger as well as for the person who receives it.

527 Class 9 introduces the difficulties involved in LKM to a difficult person. Discussion: When you are feeling anger,  
528 who is the person suffering from anger? Include discussion that LKM toward difficult person is actually  
529 compassionate toward oneself, because it promotes letting go of this anger. Introduction of concept of difficult  
530 aspects of oneself, including painful feelings, thoughts, memories, and symptoms. What aspects of ourselves  
531 do we reject and feel anger or hatred toward?

532 Class 10 provides opportunity for further discussion of LKM toward difficult person. Introduction of LKM toward  
533 groups. Discussion of how we often accumulate biases or prejudices toward groups or categories, and these  
534 biases are often not in our conscious awareness. Practice LKM toward complementary sets of groups, with  
535 discussion of whether participants feel an affinity or sense of unease practicing LKM toward one part of a  
536 group. Examples of groups include: males/females, young/elderly, Veteran/civilian, all those known to me/all  
537 those unknown to me, those near/those far.

538 Class 11 begins with discussion of LKM toward groups, with an emphasis on whether unconscious affinity or  
539 bias was detected in the ability to practice LKM.

540 Class 12 begins with discussion of walking meditation. Introduction of LKM for all beings. Discussion of  
541 different categories of beings as appropriate for each person – alive or dead, human or animal. Practice LKM  
542 toward self, friend, benefactor, neutral person, difficult person, groups, toward all beings.

543 **Homework** for those randomized to LKM homework will consist of 30 minutes of sitting or walking  
544 mindfulness (first two weeks) or LKM meditation facilitated by CD recordings with new categories of beings  
545 added as described above. Participants will also be instructed to identify opportunities for informal LKM  
546 practice each week.

547 **#2 CPT-C Course Overview.**

548 CPT-C will be led by clinicians who will be contracted by the grant to deliver this service. The group co-  
549 leaders will all have completed the VA's CPT-C training and certification program or the equivalent in the  
550 community. In addition, these clinicians will go through the necessary background checks and credentialing  
551 procedures prior to having contact with any Veterans.

552 Those assigned to CPT-C will attend weekly 90 minute group therapy sessions for 12 weeks. Treatment  
553 will be provided in groups of 10 to 12 male and female Veterans with PTSD.

554 Session 1 provides an introduction to CPT-C and education about both PTSD as a response to trauma and  
555 how trauma exposure can lead to distorted thinking and beliefs. Patients are oriented to the Impact Statement  
556 homework.

557 Session 2 draws from the Impact Statement homework and reviews how patients are currently framing the  
558 meaning of their index trauma with regard to its impact on their lives in the following areas: safety, trust,  
559 power/control, esteem, and intimacy. The concept of trauma-related cognitive “stuck points” is introduced.

560 Session 3 introduces a basic cognitive therapy overview of the relationship between thoughts and feelings  
561 prompted by triggering events through the ABC sheet (A = activating event; B = beliefs; C = consequences).

562 Session 4 elaborates on the idea of “stuck points” (e.g., “I am damaged goods;” “I’m a failure because I  
563 couldn’t save my best buddy,” etc.) that may have arisen as a result of the trauma exposure and each group  
564 member is assisted in identifying their own specific “stuck points.”

565 Session 5 provides a standard list of challenging questions that patients use to help themselves identify stuck  
566 points.

567 Session 6 provides an overview of common patterns of problematic thinking (e.g., all/none thinking, confusing  
568 feelings with facts, etc.). The Challenging Beliefs Worksheet is introduced in this session.

569 Session 7 provides further instruction on the use of the Challenging Beliefs Worksheet.

570 Session 8 reviews the safety module and patients are instructed to focus on at least one safety-related issue  
571 when completing worksheets for homework.

572 Session 9 reviews the trust module and patients are instructed to focus on at least one trust-related issue when  
573 completing worksheets for homework.

574 Session 10 reviews issues related to power/control and patients are instructed to focus on at least one  
575 power/control-related issue when completing worksheets for homework.

576 Session 11 reviews self- and other-esteem issues and patients are instructed to focus on at least one esteem-  
577 related issue when completing worksheets for homework and to write their final impact statement.

578 Session 12 reviews intimacy issues and the patients’ current sense of the event’s meaning.

579 **Homework** for those randomized to CPT-C will consist of 30 minutes of CPT-C-related homework 6 days a  
580 week including writing an impact statement at the beginning and the end of treatment, completing CPT-C  
581 worksheets, and completing exercises regarding safety, trust, power/control, esteem, and intimacy.

## 582 **Procedures for Maximizing Research Integrity and Patient Safety**

583 LKM Fidelity. The LKM teachers are highly experienced meditation teachers with experience teaching  
584 meditation to Veterans with PTSD at VAPSHCS. These teachers currently teach LKM groups and  
585 Mindfulness-Based Stress Reduction (MBSR) groups at VAPSHCS, which are offered as hospital-wide clinical  
586 programs. These teachers have extensive personal experience involving LKM. LKM is also included as a  
587 small component of the MBSR program, although the primary focus of MBSR is on mindfulness meditation.  
588 Each of these teachers is employed as a WOC-status contract employee, and meets stringent foundational  
589 teacher training requirements for MBSR, which we also apply to LKM teaching requirements: longstanding  
590 practice of mindfulness and loving-kindness meditation, experience with a body-centered awareness practice,  
591 attendance at silent mindfulness meditation retreats of at least 7 days duration, completion of the University of  
592 MA Center for Mindfulness Residential Training/Retreat as well as a teacher practicum in MBSR. We believe  
593 that these teacher training requirements and prior experience teaching MBSR will be directly applicable to  
594 high-quality teaching of LKM.

595 To assure quality control, Dr. David Kearney will review at least 2 early session tapes from each LKM  
596 cohort to provide supervisory feedback. Teaching responsibilities will be shared by Carolyn McManus, PT, MA  
597 and Jonas Batt, MA, MHC, both of whom currently teach LKM at VAPSHCS. They will co-teach the LKM  
598 courses to provide different perspectives and gender balance across the facilitators. If either of these teachers  
599 becomes unavailable, there are 3 additional experienced mindfulness and loving-kindness meditation teachers  
600 who are currently teaching other meditation classes at VAPSHCS who will be available to teach LKM. A subset  
601 of 20% of LKM classes will be coded for protocol adherence by two independent raters (see Appendix 5).  
602 Adherence and competence will be measured using treatment fidelity ratings based on the LKM curriculum.  
603 Our pool of undergraduate raters will be trained by Dr. Kearney, who will provide ongoing supervision  
604 regarding fidelity ratings.

605 CPT-C Fidelity. CPT-C group leaders selected to provide CPT-C will have completed either the VA’s  
606 national rollout dissemination training and certification process or the community equivalent, and thus will have  
607 had at least 6 months of supervised experience delivering CPT-C. They will also be employed as WOC  
608 contractors. The CPT-C supervisor will be Dr. Carie Rodgers is a national trainer in CPT for the VA National  
609 Center for PTSD who was trained by CPT originator, Dr. Patricia Resick and has extensive experience both  
610 delivering group-based CPT-C herself within VHA and supervising others.. She will provide weekly supervision  
611 based on both review of session tapes and oral reports from the group co-leaders to assure real-time quality  
612 control of CPT-C delivery.

613 A random subset of 20% of each group’s 12 sessions will be coded for protocol adherence and  
614 competence by two independent raters from our pool of undergraduate raters (see Appendix 6 for coding  
615 forms). Adherence and competence will be measured using established published measures of CPT-C

616 treatment fidelity. Raters will be trained by Dr. Galovski (CPT-C) with ongoing supervision provided by Dr.  
617 Rodgers.

618 CAPS Interview Fidelity. The Study Assessor will be a master's level clinician who will undergo training on  
619 the CAPS interview by Dr. Simpson. Dr. Simpson will sit in on at least 5% of the CAPS interviews to provide  
620 ongoing supervision.

621 Maintaining the Assessment Blind. The Study Assessor will be kept blind to participant condition:  
622 participants will be reminded not to disclose treatment assignment, and other study personnel will avoid  
623 communications that could provide such information.

624 Procedures for Maximizing Retention. Participants will update contact information at each visit and will be  
625 paid \$20 for baseline, post-test, \$30 for the 3- and 6-month assessments, and \$5 per week for the 12 online  
626 assessments. Participants who complete all assessments will be eligible for an additional \$20 bonus. The  
627 maximum remuneration is \$180 per enrollee. Frequent contact maximizes participant retention.<sup>58</sup>

628 Project Management. We will utilize web-based software to ensure coordination among study team  
629 members and reliable participant tracking.

630 Electronic Data Capture. We will utilize the online version of Assessment Center that conforms to VHA  
631 privacy and security requirements to create user friendly electronic versions of our measures that participants  
632 will complete either using VA desktop computers during the in-person major assessment appointments. This  
633 method of collecting data will ensure that items that are skipped are intentionally skipped, thus cutting down on  
634 missing data. It will also reduce the need for manual data entry, thereby decreasing the risk of introducing  
635 human error into the dataset and increasing the efficiency of moving from data collection to data cleaning and  
636 analysis.

637 Maintaining Participant Safety. Participants will be provided a phone number to call if they require  
638 psychiatric assistance, as well as the local county crisis clinic phone number. See also Appendix 7 for a full  
639 description of safety procedures.

640 **Study Instruments and Materials (Table 3; see Appendix 8 for study measures)**

| <b>Study Construct/Variables</b>                                         | <b>Study Phase</b> | <b>Measurement Scale</b> | <b>Purpose</b>                                    |
|--------------------------------------------------------------------------|--------------------|--------------------------|---------------------------------------------------|
| <b>Inclusion/Exclusion Criteria</b>                                      |                    |                          |                                                   |
| Demographic information                                                  | B                  |                          | sample description, blocking (gender); moderators |
| MINI International Neuropsychiatric Interview V-5 (DSM-IV) <sup>59</sup> | B                  | dichotomous              | sample description, exclusion                     |
| Medical history interview (seizures, DT's)                               | B                  | dichotomous              | exclusion                                         |
| Question assessing ideation of harm to self or others                    | B                  |                          | exclusion                                         |
| Drug Card Sort                                                           | B                  |                          | exclusion                                         |
| CAGE-AID                                                                 | B                  |                          | exclusion                                         |
| <b>Tracking</b>                                                          |                    |                          |                                                   |
| Contact form                                                             | B,P,3,6            |                          | retention                                         |
| <b>Primary Outcomes</b>                                                  |                    |                          |                                                   |
| Life Events Checklist <sup>60</sup>                                      | B,P,3,6            | dichotomous              | inclusion (establish Criterion A)                 |
| Clinician-Administered PTSD Scale (CAPS) <sup>57</sup>                   | B, P,3,6           | continuous               | inclusion, blocking, <b>primary outcome</b>       |
| NIH PROMIS depression measure <sup>10</sup>                              | B,P,3,6            | continuous               | <b>primary outcome</b>                            |
| <b>Mediation Analyses</b>                                                |                    |                          |                                                   |
| Self-Compassion Scale-Short Form <sup>61</sup>                           | B, W,P,3,6         | continuous               | mediation analyses                                |
| Posttraumatic cognitions inventory <sup>62</sup>                         | B,W,P,3,6          | continuous               | mediation analyses                                |
| PTSD Checklist; Civilian Version (PCL-C) <sup>63</sup>                   | B,W,P,3,6          | continuous               | mediation analyses, secondary outcome measure     |
| NIH PROMIS depression measure (static version-SF8a) <sup>10</sup>        | W                  | continuous               | mediation analyses, secondary outcome measure     |
| <b>Other</b>                                                             |                    |                          |                                                   |
| Chronic Multisymptom Illness (CMI)                                       | B                  |                          |                                                   |

|                                                                                          |                                |                          |                                                                |
|------------------------------------------------------------------------------------------|--------------------------------|--------------------------|----------------------------------------------------------------|
| Survey                                                                                   |                                |                          |                                                                |
| Spiritual Transcendence Index                                                            | B                              |                          |                                                                |
| Rome III IBS Criteria                                                                    | B                              |                          |                                                                |
| TBI screening questions                                                                  | B                              |                          |                                                                |
| Cognitive Failures Questionnaire                                                         | B, P, 3, 6                     |                          |                                                                |
| AUDIT-C                                                                                  | B                              |                          |                                                                |
| DAST-10                                                                                  | B, P, 3, 6                     |                          |                                                                |
| NIH PROMIS alcohol item bank: Use, Negative Consequences                                 | B, P, 3, 6                     |                          |                                                                |
| Alcohol Consumption (for BAC) short form                                                 | B, P, 3, 6                     |                          |                                                                |
| Experiences Questionnaire                                                                | B, P, 3, 6                     |                          |                                                                |
| Veterans Short Form Health Survey                                                        | B, P, 3, 6                     |                          |                                                                |
| NIH PROMIS CAT measures: pain interference, fatigue, sleep disturbances                  | B, P, 3, 6                     |                          |                                                                |
| NIH PROMIS Global Health, short form, static                                             | B, P, 3, 6                     |                          |                                                                |
| NIH Toolbox Emotion Battery                                                              | B, P, 3, 6                     |                          |                                                                |
| Average daily pain intensity                                                             | B, P, 3, 6                     |                          |                                                                |
| Curiosity subscale of Toronto Mindfulness Scale- short form                              | B, P, 3, 6                     |                          |                                                                |
| PROMIS GI Symptom Scales                                                                 | B, P, 3, 6                     |                          |                                                                |
| Five Facet Mindfulness Questionnaire- short form                                         | B, P, 3, 6                     |                          |                                                                |
| Medication usage                                                                         | B, P, 3, 6                     |                          |                                                                |
| Qualitative Interview                                                                    | 3                              |                          |                                                                |
| <b>VA mental health care</b>                                                             |                                |                          |                                                                |
| Corporate data warehouse mental health psychotherapy and medication management stopcodes | 9-month post-baseline interval | dichotomous & continuous | check on VA mental health services received by both conditions |
| CPRS review for engagement in mental health treatment                                    | 9-months post-baseline         | dichotomous              | check on whether either PE or CPT was obtained during study    |

### Baseline (B), Post-test (P), Weekly, 3- and 6-month Assessments

#### Overview of Outcome Measures Chosen, and Further Description of Measures

We have chosen the following measures in order to assess outcomes for the aims of this study, including PTSD symptomatology, depression, and potential mediators. The weekly monitoring phase will record the amount of homework practice completed (for both LKM and CPT-C), in order to provide the ability to assess whether homework practice is predictive of improved outcomes.

**PTSD Symptoms.** Participants' PTSD symptomatology will be assessed using the Clinician-Administered PTSD Scale (CAPS) and the PTSD checklist (PCL).

The **CAPS** is the primary outcome measure. The CAPS requires a clinician to rate 17 diagnostic symptoms of PTSD, as defined by DSM-IV criteria. (Note: because a new version of the DSM is due out in May 2013, we will update our inclusion/exclusion criteria and the main outcome assessment materials once DSM-V is made available). The CAPS gives both a continuous measure of PTSD severity and a dichotomous diagnosis of PTSD. The psychometric properties of the CAPS have been evaluated in several studies and have been found to be excellent.<sup>57</sup> The CAPS takes approximately 45 minutes to complete and will be administered at baseline, week 8, and at each major assessment (post-LKM/CPT-C, 3- and 6-months).

*Addendum: The CAPS-5 version of the CAPS measure became available before initiation of the study and was used instead of the CAPS-IV. The CAPS-5 was used to assess PTSD diagnostic status and PTSD severity. The CAPS-5 is a 30-item structured interview (range 0-80).<sup>64</sup> It has high internal consistency ( $\alpha=0.88$ ), high interrater reliability ( $ICC=0.91$ ), and good test-retest reliability ( $ICC=0.78$ ).<sup>64</sup> Interviews were performed by an experienced clinician (M.S.) blinded to participant condition.*

The PCL-C is a 17-item self-report measure that correlates highly with scores derived from the Clinician Administered PTSD Scale (CAPS).<sup>63</sup> The PCL has good internal consistency, item-total correlations, concurrent and convergent validity, and test-retest reliability. Each item is rated by the patient on a scale of 1 to 5, and the total score of the PCL is calculated as the sum of the all the items. Higher scores reflect more



665 severe PTSD.<sup>59</sup> The PCL will be administered during the weekly monitoring phase in order to allow  
666 assessment of clinical outcomes as part of mediation analyses, and will be included at weekly time points  
667 (post-LKM/CPT-C, 3- and 6-months) as a secondary outcome measure.

668 Addendum: The 20-item PCL-C version that corresponds with DSM-5 PTSD criteria became available  
669 before initiation of the study and was used instead of the 17-item version

670 Traumatic events. The number and type of traumatic events sustained over the course of each the Veteran's  
671 life will be assessed using the **Life Events Checklist (LEC)**. The LEC assesses lifetime history of exposure to  
672 a wide range of potentially traumatic events.<sup>60</sup> The LEC will be used to describe the study population, and to  
673 establish PTSD diagnostic status as part of the inclusion criteria.

674 Depression. The depression measure at each time point will be from the NIH-sponsored **Patient-Reported**  
675 **Outcomes Measurement Information System (PROMIS)** assessment suite. PROMIS was developed in  
676 order to measure patient-reported outcomes using item response theory (IRT) and computerized adaptive  
677 testing (CAT) which allows for efficient, psychometrically robust assessment of patient-reported outcomes in  
678 clinical trials involving a wide range of chronic conditions, and they have been validated in over 21,000  
679 persons.<sup>10,65</sup> CAT is a method by which the items administered are adaptive to the health status of the subject,  
680 i.e., the instrument used is not "static" for each subject. Using CAT and IRT, the PROMIS measures are  
681 designed to gain the maximal information content from each question by gauging the point of disease severity  
682 a question is most efficient. The greater precision gained by use of these techniques has been estimated to  
683 allow reduction in sample size requirements by up to half compared with "static" pen and paper instruments.<sup>65</sup>  
684 Most PROMIS item banks utilize a 7-day recall period. These measures utilize item-response theory<sup>66</sup> and  
685 computerized adaptive testing (CAT), in order to provide a high degree of precision. Using CAT, each domain  
686 measures average 5-8 questions in length and takes only 1-2 minutes to complete. We will utilize the CAT  
687 version of the PROMIS depression measure for the major assessment points, and the static version of the  
688 PROMIS depression measure (SF8a) at the weekly assessments (using Survey Monkey for electronic data  
689 capture).

690 Self-compassion. The **Self-Compassion Scale – Short Form (SCS-SF)**<sup>61</sup> is a 12-item measure of self-  
691 compassion (see also broaden-and-build section of background/significance). It has been shown to be reliable  
692 (Cronbach's alpha = 0.86) and to have a very high degree of correlation ( $r \geq 0.97$ ) with the longer and  
693 previously validated self-compassion scale.<sup>39</sup>

694 Posttraumatic Cognitions Inventory (PTCI).<sup>62</sup> The PTCI is a 36-item measure that assesses trauma-related  
695 thoughts and beliefs including negative cognitions about self, about the world, and self-blame. Items are rated  
696 on a 7-point scale ranging from "totally disagree" to "totally agree." The PTCI has been found to discriminate  
697 well between people who do and do not have PTSD and has been found to have good internal consistency,  
698 test-retest reliability, and construct validity. The PTCI will be administered at baseline and follow-up time points  
699 as a secondary outcome measure. The abbreviated 22-item version<sup>44</sup> will be collected weekly to assess  
700 whether changes in posttraumatic cognitions mediate changes in the primary outcome measures.

701 Weekly monitoring assessment protocol. Weekly assessment of type and duration of LKM and CPT-C  
702 homework practices completed along with measures of PTSD and depression and the proposed intervention  
703 mediators will be assessed weekly during the twelve weeks of LKM or CPT-C treatment. The weekly  
704 assessments will be administered via take home paper assessment. (See Appendix 9 for weekly items.)

705 Assessment of Usual VA Mental Health Care. In order to quantify the amount of VA mental health care that  
706 study participants obtain during their involvement in the proposed study, data extraction from both the VA  
707 Corporate Data Warehouse (CDW) and from the computerized patient record system (CPRS). The number of  
708 individual and group psychotherapy stopcodes and mental health medication management stopcodes will be  
709 recorded for all participants for the period of time they are directly involved in LKM (and equivalent time period  
710 for CPT-C) from the CDW. These numbers will be cross-checked via CPRS and CPRS therapy notes will be  
711 assessed to determine whether study participants were involved in treatments for PTSD during their  
712 involvement in LKM or the follow-up period (and equivalent time period for CPT-C). We will also use CPRS to  
713 code for psychiatric and pain medication adjustments during study involvement.

## 714 **Data Analysis**

715 **Overview.** Before performing the primary analyses, outliers, shape of distributions, and associations  
716 between outcomes will be determined. Covariates or propensity scores will be utilized to adjust for differences  
717 if imbalances between treatment groups on key variables are identified. Gender and type of trauma will also be  
718 considered as covariates. All analyses will be performed using an intention-to-treat sample as well as per  
719 protocol analyses. Per protocol analyses are the preferred method for non-inferiority analyses, in order to

avoid biasing the results toward no difference between groups, which could occur in intention-to-treat samples. In addition, pattern-mixture models will be used to identify potential missing data patterns,<sup>67</sup> and multiple imputation techniques will be used to accommodate missing data.<sup>68</sup>

**AIMS 1 and 2.** To determine if LKM is therapeutically similar to CPT-C, we will estimate the effect of LKM vs. CPT-C using a multilevel mixed effects model with random effects for repeated measures. If significant correlation exists between outcomes among participants in the same therapy group (i.e., ICC>0), therapy group also will be included as a random effect in the model. The primary outcomes for AIM 1 are participant scores on the CAPS.<sup>60</sup> As the models for AIM 1 and AIM 2 (PTSD and depressive symptoms, respectively) will be identical, we focus on the CAPS. The analysis will include all of the primary assessment time points (Baseline, post-LKM/CPT-C, 3- and 6- months). Mixed models are an appropriate choice for three reasons. First, they accommodate the clustered nature of the data at multiple levels (i.e., repeated measures within persons). Second, should significant correlation exist among participants in the same therapy group, inclusion of group as a random factor allows for generalization of results to LKM and CPT-C groups in general (not just the groups in the study). Third, they are flexible with respect to missing data.<sup>69</sup> Mixed effects models will include treatment condition (LKM vs. CPT-C), time, and time by treatment interaction to determine if differences in exist between conditions by time. Time will be modeled as a dummy variable to allow for variation in effects over time. Both unadjusted and adjusted (covariates include baseline PROMIS depression score for Aim 1 and baseline CAPS for Aim2, age, gender) models will be run. Subgroup effects of PTSD severity on outcomes will be explored using tests of interaction.

A non-inferiority analysis determines if the effects of a new intervention are similar to an established treatment within a pre-stated margin of or range of non-inferiority that is considered clinically acceptable ( $\delta$ ).<sup>70</sup> We chose a non-inferiority margin of 10 points on the CAPS. A difference of 10 points on the CAPS represents Cohen's  $d = 0.50$  in treatment-seeking Vietnam Veterans with PTSD, for whom the SD is roughly 20.<sup>71</sup> A reduction of 10 points on the CAPS is considered the minimal effect that would be clinically meaningful.<sup>71</sup>

*Addendum: The CAPS-5 measure became available before the study was initiated and was used in place of the CAPS-IV. We defined a non-inferiority margin on the CAPS-5 using the same methodology as was used for defining the non-inferiority margin using CAPS-IV. The primary outcome of non-inferiority of LKM relative to CPT-C was assessed using a non-inferiority margin of 5 points on the CAPS-5, which represents 0.5 SD of baseline PTSD symptoms based on data indicating the SD of baseline CAPS-5 scores is approximately 10 in a large sample (N=198) of treatment-seeking veterans.<sup>72</sup> An effect size of Cohen's  $d = 0.5$  has been defined as the minimally important difference in prior PTSD trials.<sup>71,73</sup> For depression, the non-inferiority margin was 4 points on the PROMIS depression measure, which has been defined as the minimally important difference and corresponds to a Cohen's  $d$  effect size of approximately 0.50.<sup>11,74</sup> A reduction of 4 points on the PROMIS depression measure is the minimal effect considered clinically meaningful, which corresponds to an effect size of approximately 0.5.<sup>11</sup> Hypothesis testing in a non-inferiority analysis is reversed from the standard formulation. The null hypothesis ( $H_0$ ) states that LKM is at least an amount  $\delta$  worse than CPT-C. The alternative ( $H_A$ ) states that the post-treatment mean in LKM is no worse than amount  $\delta$  as compared to CPT-C.<sup>75</sup> We will assess non-inferiority at 6 month follow-up, as well as other time points (post-LKM/CPT-C, 3-month follow-up) using methods outlined by Mascha and Sessler.<sup>76</sup> Non-inferiority of LKM to CPT-C for reduction in PTSD symptoms will be claimed if the lower limit of the 95% confidence interval for difference in 6-month mean CAPS scores is greater than -10. Non-inferiority of LKM to CPT-C for reduction in depressive symptoms will be claimed if the lower limit of the 95% confidence interval for difference in 6-month mean t-score in the PROMIS depression measure is greater than -4.<sup>11</sup> The test of non-inferiority is similar to the usual test for differences between treatments obtained in a mixed effects model except that the non-inferiority margin  $\delta$  is added to the treatment effect coefficient  $b_3$  and divided by the standard error.<sup>76</sup>*

$$T_{NI} = \frac{b_3 + \delta}{SE}$$

If non-inferiority is not shown in the above analyses for AIM 1, traditional 'superiority' analyses will be conducted for comparisons between the interventions. This will involve a simple comparison of means at the 6-month time point on the primary outcomes. We chose an effect size of  $d=.50$ <sup>51,71</sup> for the comparison of the active treatments. Although the study is powered for the non-inferiority analyses, we also report a power analysis for these preliminary analyses. Assuming an effect of  $d=.50$  between treatment arms and a two-sided  $\alpha$  of 0.05 resulted in a power estimate of approximately 90%.

773 **Power and Sample Size:**

774 Sample size for the non-inferiority hypotheses specified in AIM 1 was determined using Stata statistical  
775 software.<sup>77</sup> Assuming a non-inferiority margin of 10 points on the CAPS (see rationale noted above) and the  
776 typical alpha for a one-sided non-inferiority test (.025),<sup>75</sup> a total sample of 126 participants, (63 PTSD patients  
777 per randomization arm) resulted in a power estimate of 80%. *Sample size calculations were unchanged using*  
778 *the CAPS-5 measure as described above.* To protect against the effects of attrition, we added 26% to this final  
779 sample size for a recruitment goal of 170 patients. This attrition estimate was based on our pilot study  
780 assessing longitudinal outcomes of LKM.

781 In a preliminary analysis of our LKM pilot data (see preliminary studies section), the intraclass correlation  
782 (ICC) for PTSD symptoms (using the PSS-I; n=42) was  $\rho = 0.00$  and for depression (using the PROMIS  
783 measure) was 0.026 ( $p = \text{NS}$  for both). Additionally, pilot data based on the VAPSHCS MBSR program  
784 showing an ICC for PTSD symptoms (using the PCL; n=118) of  $\rho = 0.00$  at post-treatment and  $\rho = 0.05$  at  
785 follow-up ( $p = \text{NS}$ ). Because our pilot data obtained at our site do not indicate significant correlation of  
786 measures within groups, we propose analyses that do not incorporate ICC results and are not powered to  
787 account for them.

788 **Exploratory AIM:** Mediators of response to LKM and CPT-C

789 To assess mediation, we will first assess temporality of change of the proposed mediators and outcomes  
790 (as described below). If it is established that changes in the proposed mediators precede changes in  
791 depressive and PTSD symptoms, we will assess mediation using an analytic framework developed for use in  
792 randomized controlled trials of two interventions with equivalent outcomes.<sup>19</sup> The framework developed by  
793 Gallagher and Resick<sup>19</sup> (described in more detail below) allows assessment of whether two interventions  
794 produce similar outcomes through different mediational processes. In the proposed trial comparing LKM to  
795 CPT-C, the two interventions share many common factors, but differ in the focus of the intervention (i.e., LKM  
796 emphasizes self-compassion without a focus on cognitive restructuring, whereas CPT-C places a primary  
797 emphasis on correcting maladaptive cognitions without a primary focus of developing self-compassion). We  
798 propose to examine mechanisms of change for each intervention by assessing intraindividual change in self-  
799 compassion and maladaptive cognitions, and then to examine whether intraindividual change in the proposed  
800 mediators mediates outcomes (PTSD symptoms, depressive symptoms).

801 Establishment of Temporal Sequence of Change in Mediators and Outcome Measures: To assess  
802 mediation, it is important to assess whether changes in the proposed mediators (self-compassion,  
803 posttraumatic maladaptive cognitions) precede change in clinical outcomes (PTSD and depressive  
804 symptoms).<sup>78</sup> Weekly measures will be obtained during the treatment phase, in order to provide an  
805 assessment schedule that allows measurement of the mediators before improvement occurs in clinical  
806 outcomes (PTSD and depressive symptoms). The temporal relationship between the proposed mediators and  
807 clinical outcomes will be analyzed according to methods defined by Kleim and colleagues (2012)<sup>44</sup> using  
808 bivariate latent growth modeling. Briefly, this first involves modeling weekly latent change processes in  
809 mediators and outcomes separately, to find the best representation of latent trajectories. A dual linear growth  
810 curve is then calculated, in which latent growth curves are simultaneously estimated for the proposed  
811 mediators and the clinical outcomes. Next, the degree to which change in the proposed mediator at week X is  
812 associated with change in PTSD at week X+1 (as well as the inverse to test whether changes in  
813 depressive/PTSD symptoms predict changes in the proposed mediators) is evaluated to examine whether the  
814 requirement of change in the mediator preceding change in the outcome is met. This process assesses  
815 whether a larger than average change on one variable is associated with a larger than average change on the  
816 other variable at a later time point. Within this framework, when, for example a greater reduction in  
817 posttraumatic maladaptive cognitions is associated with a greater reduction in PTSD symptoms in the next  
818 session, it is assumed that changes in the first variable cause changes in the second variable. These models  
819 will be utilized to determine the optimal time points (from baseline) to assess change scores in mediators and  
820 outcomes for the mediation models described below.

821 Mediation: Within-treatment intraindividual changes will first be analyzed for self-compassion,  
822 maladaptive cognitions, PTSD and depression using difference scores (each week's score minus baseline  
823 score for each measure) using procedures defined by Gallagher and Resick (2012).<sup>19</sup> The degree to which  
824 change in self-compassion mediates change in outcome in LKM relative to CPT-C will be evaluated by  
825 examining the indirect effect of treatment condition (LKM vs. CPT-C) on intraindividual change in PTSD  
826 symptoms via intraindividual change in self-compassion.

827 These procedures will be repeated to evaluate the degree to which change in maladaptive cognitions

828 mediates change in CPT-C relative to LKM by examining the indirect effect of treatment condition (CPT-C vs.  
829 LKM) on intraindividual change in PTSD symptoms via intraindividual change in maladaptive cognitions. The  
830 above analysis will be repeated for depressive symptoms.

831 Indirect effects will be calculated to yield bias-corrected and accelerated bootstrapped confidence  
832 intervals of indirect effects. If the confidence interval of the indirect effect does not include zero, mediation will  
833 be shown.

### 834 **Project Timeline**

835 Approximately 20-22 Veterans will be recruited for each of the 12 study cohorts. The first cohort will undergo  
836 baselines assessments in month 5 (following a 4-month recruitment phase). Cohorts will be approximately  
837 evenly distributed over the course of the study. We have previously been successful in obtaining timely  
838 regulatory approvals for LKM and MBSR studies at VAPSHCS, including the two randomized pilot trials  
839 described in the preliminary studies section.

### 841 **Limitations**

842 The study design is a fairly ambitious one with a weekly monitoring feature that could pose challenges for  
843 retention and compliance with the research protocol. A modest remuneration schedule is likely to help maintain  
844 compliance with the study protocol, and our previous research with PTSD and alcohol dependent individuals  
845 examining frequent monitoring has shown excellent compliance. Other design considerations include the  
846 inclusion of male and female participants with mixed trauma histories and inclusion of individuals with  
847 Substance Abuse and/or Alcohol Dependence (AD). Briefly, most PTSD treatment trials have involved fairly  
848 homogeneous samples, which while likely reducing experimental noise, also limit the generalizability of the  
849 findings. We felt that the ability to obtain data that has a chance of being highly generalizable to Veterans who  
850 are seeking care for PTSD, which is more often than not associated with comorbid conditions,<sup>16</sup> was preferable  
851 to maintaining strict experimental control. In addition, we have successfully delivered LKM in mixed-gender  
852 groups and our clinical impression is that both the male and the female Veterans benefited from the exposure  
853 to the opposite gender in this therapeutic context.

854  
855 Another design consideration is that each of the two interventions will be delivered in closed-group  
856 format and there is some risk that people within each of the groups will influence one another to the extent that  
857 there are group effects on outcomes.<sup>79</sup> If ICC's are significant in the proposed study, this would result in  
858 decreased statistical power to detect the primary outcomes.

859  
860 Despite limitations the proposed research has considerable conceptual and clinical merit and represents a  
861 necessary step in examining whether LKM is associated with clinical benefit for Veterans with PTSD. Results  
862 of this research can be readily applied in both VA and community settings to treat PTSD.

### 863 **Application Summary**

864  
865 The proposed research is an extension of our previous and ongoing work. This application will address  
866 a relative void in the intervention literature for PTSD by assessing the non-inferiority of a standardized  
867 meditation intervention, LKM. In light of the growing interest in complementary and alternative medicine among  
868 Veterans and the lack of empirical data on such approaches for common disorders, such as PTSD, this  
869 research will make an important contribution to the field. We believe the proposed research is timely,  
870 important, and innovative, and the track records of Drs. Kearney and Simpson and the research team indicate  
871 we are capable of successfully carrying out and completing the proposed work.  
872  
873  
874

- 875 1. Kessler RC. Posttraumatic stress disorder: the burden to the individual and to society. *Journal of*  
876 *Clinical Psychiatry*. 2000;61:4-12 (suppl 15).
- 877 2. Kessler RC, Borges G, Walters EE. Prevalence of and risk factors for lifetime suicide attempts in the  
878 national comorbidity survey. *Archives of General Psychiatry*. 1999;56(7):617-626.
- 879 3. Davidson JRT. Recognition and treatment of posttraumatic stress disorder. *Jama-Journal of the*  
880 *American Medical Association*. 2001;286(5):584-588.
- 881 4. Braet C, Claus L, Goossens L, Moens E, Van Vlierberghe L, Soetens B. Differences in eating style  
882 between overweight and normal-weight youngsters. *Journal of Health Psychology*. 2008;13(6):733-743.
- 883 5. Wachen JS, Resick P, Mintz, et al. Group Cognitive Processing Therapy for Combat-Related Post-  
884 Traumatic Stress Disorder: Main Findings on PTSD and Depression. International Society for Traumatic  
885 Stress Studies; November 2, 2012, 2012; Los Angeles, CA.
- 886 6. Lombardo TW. Beyond Exposure for Posttraumatic Stress Disorder (PTSD) Symptoms: Broad-  
887 Spectrum PTSD Treatment Strategies. *Behavior Modification*. 2005;29(1):3-9.
- 888 7. Baldwin CM, Long K, Kroesen K, Brooks AJ, Bell IR. A profile of military veterans in the southwestern  
889 United States who use complementary and alternative medicine - Implications for integrated care.  
890 *Archives of Internal Medicine*. 2002;162(15):1697-1704.
- 891 8. Kroesen K, Baldwin CM, Brooks AJ, Bell IR. US military veterans' perceptions of the conventional  
892 medical care system and their use of complementary and alternative medicine. *Family Practice*.  
893 2002;19(1):57-64.
- 894 9. Fredrickson BL, Cohn MA, Coffey KA, Pek J, Finkel SM. Open hearts build lives: Positive emotions,  
895 induced through loving-kindness meditation, build consequential personal resources. *Journal of*  
896 *Personality and Social Psychology*. 2008;95(5):1045-1062.
- 897 10. Cella D, Yount S, Rothrock N, et al. The Patient-Reported Outcomes Measurement Information System  
898 (PROMIS) Progress of an NIH roadmap cooperative group during its first two years. *Medical Care*.  
899 2007;45(5):S3-S11.
- 900 11. Yost KJ, Eton DT, Garcia SF, Cella D. Minimally important differences were estimated for six Patient-  
901 Reported Outcomes Measurement Information System-Cancer scales in advanced-stage cancer  
902 patients. *Journal of Clinical Epidemiology*. 2011;64(5):507-516.
- 903 12. *American Psychiatric Association [DSM-IV-TR]*. Washington, DC2000.
- 904 13. Davidson JRT, Stein DJ, Shalev AY, Yehuda R. Posttraumatic stress disorder: acquisition, recognition,  
905 course, and treatment. *Journal of Neuropsychiatry & Clinical Neurosciences*. 2004;16(2):135-147.
- 906 14. Thomas JL, Wilk JE, Riviere LA, McGurk D, Castro CA, Hoge CW. Prevalence of Mental Health  
907 Problems and Functional Impairment Among Active Component and National Guard Soldiers 3 and 12  
908 Months Following Combat in Iraq. *Archives of General Psychiatry*. 2010;67(6):614-623.
- 909 15. Eisen SA, Griffith KH, Xian H, et al. Lifetime and 12-month prevalence of psychiatric disorders in 8,169  
910 male Vietnam War era veterans. *Military Medicine*. 2004;169(11):896-902.
- 911 16. Kessler RC, Sonnega A, Bromet E, Hughes M, Nelson CB. Posttraumatic-stress-disorder in the  
912 national comorbidity survey. *Archives of General Psychiatry*. 1995;52(12):1048-1060.
- 913 17. Cogle JR, Resnick H, Kilpatrick DG. PTSD, DEPRESSION, AND THEIR COMORBIDITY IN  
914 RELATION TO SUICIDALITY: CROSS-SECTIONAL AND PROSPECTIVE ANALYSES OF A  
915 NATIONAL PROBABILITY SAMPLE OF WOMEN. *Depression and Anxiety*. 2009;26(12):1151-1157.
- 916 18. Schoenfeld FB, Marmar CR, Neylan TC. Current concepts in pharmacotherapy for posttraumatic stress  
917 disorder. *Psychiatric Services*. 2004;55(5):519-531.
- 918 19. Gallagher MW, Resick PA. Mechanisms of Change in Cognitive Processing Therapy and Prolonged  
919 Exposure Therapy for PTSD: Preliminary Evidence for the Differential Effects of Hopelessness and  
920 Habituation. *Cognitive Therapy and Research*. 2012;36(6):750-755.
- 921 20. Schnurr PP, Friedman MJ, Engel CC, et al. Cognitive behavioral therapy for posttraumatic stress  
922 disorder in women - A randomized controlled trial. *Jama-Journal of the American Medical Association*.  
923 2007;297(8):820-830.
- 924 21. Rosen CS, Chow HC, Finney JF, et al. VA practice patterns and practice guidelines for treating  
925 posttraumatic stress disorder. *Journal of Traumatic Stress*. 2004;17(3):213-222.
- 926 22. Karlin BE, Ruzek JI, Chard KM, et al. Dissemination of Evidence-Based Psychological Treatments for  
927 Posttraumatic Stress Disorder in the Veterans Health Administration. *Journal of Traumatic Stress*.  
928 2010;23(6):663-673.

- 929 23. Saydah SH, Eberhardt MS. Use of complementary and alternative medicine among adults with chronic  
930 diseases: United States 2002. *Journal of Alternative and Complementary Medicine*. 2006;12(8):805-  
931 812.
- 932 24. Micek MA, Bradley KA, Braddock CH, Maynard C, McDonell M, Fihn SD. Complementary and  
933 alternative medicine use among veterans affairs outpatients. *Journal of Alternative and Complementary*  
934 *Medicine*. 2007;13(2):190-193.
- 935 25. Neff KD, Rude SS, Kirkpatrick KL. An examination of self-compassion in relation to positive  
936 psychological functioning and personality traits. *J Res Pers*. 2007;41(4):908-916.
- 937 26. Krupnick JL, Green BL, Stockton P, Miranda J, Krause E, Mete M. Group interpersonal psychotherapy  
938 for low-income women with posttraumatic stress disorder. *Psychotherapy Research*. 2008;18(5):497-  
939 507.
- 940 27. Thompson BL, Waltz J. Self-Compassion and PTSD Symptom Severity. *Journal of Traumatic Stress*.  
941 2008;21(6):556-558.
- 942 28. Gilbert P, Procter S. Compassionate mind training for people with high shame and self-criticism:  
943 overview and pilot study of a group therapy approach. *Clinical Psychology & Psychotherapy*.  
944 2006;13(6):353-379.
- 945 29. Carson JW, Keefe FJ, Lynch TR, et al. Loving-kindness meditation for chronic low back pain. *Journal of*  
946 *Holistic Nursing*. 2005;23(3):287-304.
- 947 30. Hutcherson CA, Seppala EM, Gross JJ. Loving-Kindness Meditation Increases Social Connectedness.  
948 *Emotion*. 2008;8(5):720-724.
- 949 31. Johnson DP, Penn DL, Fredrickson BL, Meyer PS, Kring AM, Brantley M. Loving-kindness meditation  
950 to enhance recovery from negative symptoms of schizophrenia. *Journal of Clinical Psychology*.  
951 2009;65(5):499-509.
- 952 32. Salzberg S. *Lovingkindness: the revolutionary art of happiness*. Boston, MA: Shambhala Publications,  
953 Inc.; 1995.
- 954 33. Foa EB, Riggs DS. Posttraumatic stress disorder and rape. *American Psychiatric Press Review of*  
955 *Psychiatry*. 1993;12:273-303.
- 956 34. Herman J. *Trauma and Recovery: The Aftermath of Violence--from Domestic Abuse to Political Terror*.  
957 Basic Books; 1997.
- 958 35. King LA, King DW, Fairbank JA, Keane TM, Adams GA. Resilience-recovery factors in post-traumatic  
959 stress disorder among female and male Vietnam veterans: Hardiness, postwar social support, and  
960 additional stressful life events. *Journal of Personality and Social Psychology*. 1998;74(2):420-434.
- 961 36. Fredrickson BL. The broaden-and-build theory of positive emotions. *Philosophical Transactions of the*  
962 *Royal Society of London Series B-Biological Sciences*. 2004;359(1449):1367-1377.
- 963 37. Johnson KJ, Fredrickson BL. "We all look the same to me" - Positive emotions eliminate the own-race  
964 bias in face recognition. *Psychological Science*. 2005;16(11):875-881.
- 965 38. Rounsaville BJ, Carroll KM, Onken LS. A Stage Model of Behavioral Therapies research: Getting  
966 started and moving on from stage I. *Clinical Psychology-Science and Practice*. 2001;8(2):133-142.
- 967 39. Neff KD. The development and validation of a scale to measure self-compassion. *Self and Identity*.  
968 2003;2:223-250.
- 969 40. Leary MR, Tate EB, Adams CE, Allen AB, Hancock J. Self-compassion and reactions to unpleasant  
970 self-relevant events: the implications of treating oneself kindly. *Journal of Personality and Social*  
971 *Psychology*. 2007;92(5):887-904.
- 972 41. Kuyken W, Watkins E, Holden E, et al. How does mindfulness-based cognitive therapy work? *Behav*  
973 *Res Ther*. 2010;48(11):1105-1112.
- 974 42. Resick PA, Schnicke MK. Cognitive Processing Therapy for Sexual Assault Victims. *Journal of*  
975 *Consulting and Clinical Psychology*. 1992;60(5):748-756.
- 976 43. Resick PA, Galovski TE, Uhlmansiek MO, Scher CD, Clum GA, Young-Xu Y. A Randomized clinical  
977 trial to dismantle components of cognitive processing therapy for posttraumatic stress disorder in  
978 female victims of interpersonal violence. *Journal of Consulting and Clinical Psychology*.  
979 2008;76(2):243-258.
- 980 44. Kleim B, Grey N, Wild J, et al. Cognitive Change Predicts Symptom Reduction With Cognitive Therapy  
981 for Posttraumatic Stress Disorder. *Journal of Consulting and Clinical Psychology*. 2012;Advance online  
982 publication.
- 983 45. Longmore RJ, Worrell M. Do we need to challenge thoughts in cognitive behavior therapy? *Clin*  
984 *Psychol Rev*. 2007;27(2):173-187.

- 985 46. Tsuang MT, Simpson JC, Koenen KC, Kremen WS, Lyons MJ. Spiritual well-being and health. *Journal*  
986 *of Nervous and Mental Disease*. 2007;195(8):673-680.
- 987 47. Litz BT, Gray MJ. Emotional numbing in posttraumatic stress disorder: current and future research  
988 directions. *Australian and New Zealand Journal of Psychiatry*. 2002;36(2):198-204.
- 989 48. Resick PA, Monson CM, Chard KM. *Cognitive processing therapy: Veteran/military version*.  
990 Washington, DC: Department of Veterans Affairs;2008.
- 991 49. Resick P. Cognitive therapy for posttraumatic stress disorder. *Journal of cognitive Psychotherapy*.  
992 2001;15(4):321-329.
- 993 50. Resick PA, Nishith P, Weaver TL, Astin MC, Feuer CA. A comparison of cognitive-processing therapy  
994 with prolonged exposure and a waiting condition for the treatment of chronic posttraumatic stress  
995 disorder in female rape victims. *Journal of Consulting and Clinical Psychology*. 2002;70(4):867-879.
- 996 51. Monson CM, Schnurr PP, Resick PA, Friedman MJ, Young-Xu Y, Stevens SP. Cognitive processing  
997 therapy for veterans with military-related posttraumatic stress disorder. *Journal of Consulting and*  
998 *Clinical Psychology*. 2006;74(5):898-907.
- 999 52. Bernardy NC, Hamblen JL, Friedman MJ, Ruzek JI, McFall ME. Implementation of a posttraumatic  
000 stress disorder mentoring program to improve treatment services. *Psychological Trauma: Theory,*  
001 *Research, Practice, and Policy*. 2011;3(3):292.
- 002 53. Seal KH, Bertenthal D, Miner CR, Sen S, Marmar C. Bringing the war back home - Mental health  
003 disorders among 103 788 US veterans returning from Iraq and Afghanistan seen at Department of  
004 Veterans Affairs facilities. *Archives of Internal Medicine*. 2007;167(5):476-482.
- 005 54. Hollon SD, Munoz RF, Barlow DH, et al. Psychosocial intervention development for the prevention and  
006 treatment of depression: Promoting innovation and increasing access. *Biological Psychiatry*.  
007 2002;52(6):610-630.
- 008 55. Imel ZE, Wampold BE, Miller SD, Fleming RR. Distinctions Without a Difference: Direct Comparisons of  
009 Psychotherapies for Alcohol Use Disorders. *Psychology of Addictive Behaviors*. 2008;22(4):533-543.
- 010 56. MacCoon DG, Imel ZE, Rosenkranz MA, et al. The validation of an active control intervention for  
011 Mindfulness Based Stress Reduction (MBSR). *Behav Res Ther*. 2012;50(1):3-12.
- 012 57. Weathers FW, Keane TM, Davidson JR. Clinician-administered PTSD scale: a review of the first ten  
013 years of research. *Depression & Anxiety*. 2001;13(3):132-156.
- 014 58. Scott CK, Sonis J, Creamer M, Dennis ML. Maximizing follow-up in longitudinal studies of traumatized  
015 populations. *Journal of Traumatic Stress*. 2006;19(6):757-769.
- 016 59. Sheehan DV, Lecrubier Y, Sheehan KH, et al. The Mini-International Neuropsychiatric Interview (MINI):  
017 The development and validation of a structured diagnostic psychiatric interview for DSM-IV and ICD-10.  
018 *Journal of Clinical Psychiatry*. 1998;59:22-33.
- 019 60. Blake DD, Weathers FW, Nagy LM, et al. The development of a clinician-administered PTSD scale.  
020 *Journal of Traumatic Stress*. 1995;8(1):75-90.
- 021 61. Raes F, Pommier E, Neff KD, Van Gucht D. Construction and Factorial Validation of a Short Form of  
022 the Self-Compassion Scale. *Clinical Psychology & Psychotherapy*. 2011;18(3):250-255.
- 023 62. Foa EB, Ehlers A, Clark DM, Tolin DF, Orsillo SM. The Posttraumatic Cognitions Inventory (PTCI):  
024 Development and validation. *Psychological Assessment*. 1999;11(3):303-314.
- 025 63. Weathers FW, Litz BT, Herman DS, Huska JA, Keane TM. The PTSD Checklist (PCL): Reliability,  
026 validity, and diagnostic utility. Paper presented at the 9th Annual Meeting of the International Society for  
027 Traumatic Stress Studies; 1993; San Antonio, TX.
- 028 64. Weathers FW, Bovin MJ, Lee DJ, et al. The Clinician-Administered PTSD Scale for DSM-5 (CAPS-5):  
029 Development and initial psychometric evaluation in military veterans. *Psychol Assess*. 2018;30(3):383-  
030 395.
- 031 65. Fries JF, Krishnan E. What constitutes progress in assessing patient outcomes? *Journal of Clinical*  
032 *Epidemiology*. 2009;62(8):779-780.
- 033 66. Cook KF, Kallen MA, Amtmann D. Having a fit: impact of number of items and distribution of data on  
034 traditional criteria for assessing IRT's unidimensionality assumption. *Quality of Life Research*.  
035 2009;18(4):447-460.
- 036 67. Atkins DC. Using multilevel models to analyze couple and family treatment data: Basic and advanced  
037 issues. *Journal of Family Psychology*. 2005;19(1):98-110.
- 038 68. Little R, Rubin D. *Statistical analysis with missing data*. New York: Wiley; 1987.
- 039 69. Raudenbush SW, Bryk AS. *Hierarchical linear models*. Thousand Oaks, CA: Sage; 2002.

- 040 70. Piaggio G, Elbourne DR, Altman DG, Pocock SJ, Evans SJW, Grp C. Reporting of noninferiority and  
041 equivalence randomized trials - An extension of the CONSORT Statement. *Jama-Journal of the*  
042 *American Medical Association*. 2006;295(10):1152-1160.
- 043 71. Schnurr PP, Friedman MJ, Foy DW, et al. Randomized trial of trauma-focused group therapy for  
044 posttraumatic stress disorder - Results from a Department of Veterans Affairs Cooperative Study.  
045 *Archives of General Psychiatry*. 2003;60(5):481-489.
- 046 72. Marx BP. In:2019.
- 047 73. Greene CJ, Morland LA, Durkalski VL, Frueh BC. Noninferiority and Equivalence Designs: Issues and  
048 Implications for Mental Health Research. *Journal of Traumatic Stress*. 2008;21(5):433-439.
- 049 74. Swanholm E, McDonald W, Makris U, Noe C, Gatchel R. Estimates of Minimally Important Differences  
050 (MIDs) for Two Patient-Reported Outcomes Measurement Information System (PROMIS) Computer-  
051 Adaptive Tests in Chronic Pain Patients. 2014;19(4):217-232.
- 052 75. Laster LL, Johnson MF, Kotler ML. Non-inferiority trials: the 'at least as good as' criterion with  
053 dichotomous data. *Statistics in Medicine*. 2006;25(7):1115-1130.
- 054 76. Mascha EJ, Sessler DI. Equivalence and Noninferiority Testing in Regression Models and Repeated-  
055 Measures Designs. *Anesthesia and Analgesia*. 2011;112(3):678-687.
- 056 77. *SSI: Stata module to estimate sample size for randomized controlled trials, Statistical Software*  
057 *Components S457150* [computer program]. Boston College Department of Economics; 2010.
- 058 78. Kazdin AE. Mediators and mechanisms of change in psychotherapy research. In: *Annual Review of*  
059 *Clinical Psychology*. Vol 3.2007:1-27.
- 060 79. Baldwin SA, Murray DM, Shadish WR. Empirically supported treatments or type I errors? Problems with  
061 the analysis of data from group-administered treatments. *Journal of Consulting and Clinical*  
062 *Psychology*. 2005;73(5):924-935.
- 063
